# Supplementary material for: Preferential adsorption of ethane over ethylene on a Zr-based metal–organic framework: impacts of C–H⋯N hydrogen bonding
Source: Royal Society of Chemistry journal article supplement (doi:10.1039/d1nj00414j), 2021-01-01
Supplement: d1nj00414j1.pdf [file d1nj00414j1.pdf]

## Supporting Information

### **Preferential adsorption of ethane over ethylene on a Zr-based metal-organic framework: impacts of C-H $\cdots$ N hydrogen bond**

Yaping Zhang,<sup>a</sup> Daofei Lv,<sup>\*b</sup> Jiayu Chen,<sup>c</sup> Zewei Liu,<sup>\*c</sup> Chongxiong Duan,<sup>d</sup> Xin Chen,<sup>b</sup> Wenbing Yuan,<sup>b</sup> Hongxia Xi<sup>c</sup> and Qibin Xia<sup>c</sup>

<sup>a</sup>College of Harbour and Environmental Engineering, Jimei University, Xiamen 361021, PR China

<sup>b</sup>School of Environmental and Chemical Engineering, Foshan University, Foshan 528000, PR China

<sup>c</sup>School of Chemistry and Chemical Engineering, South China University of Technology, Guangzhou 510641, PR China

<sup>d</sup>School of Materials Science and Hydrogen Engineering, Foshan University, Foshan 528231, PR China

---

Address correspondence to E-mail: lvdaofei@163.com (DL) and liuzeweiscut@gmail.com (ZL)



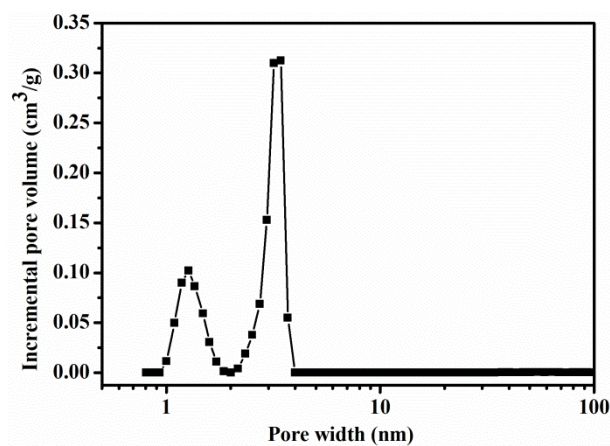

**Fig. S4** Pore size distribution of MOF-545.

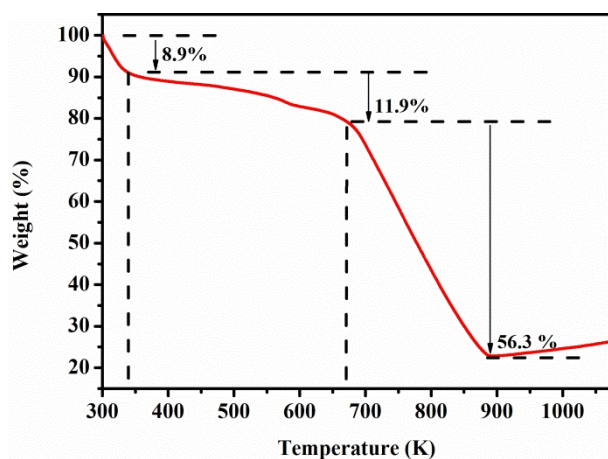

**Fig. S5** TGA curve of MOF-545.

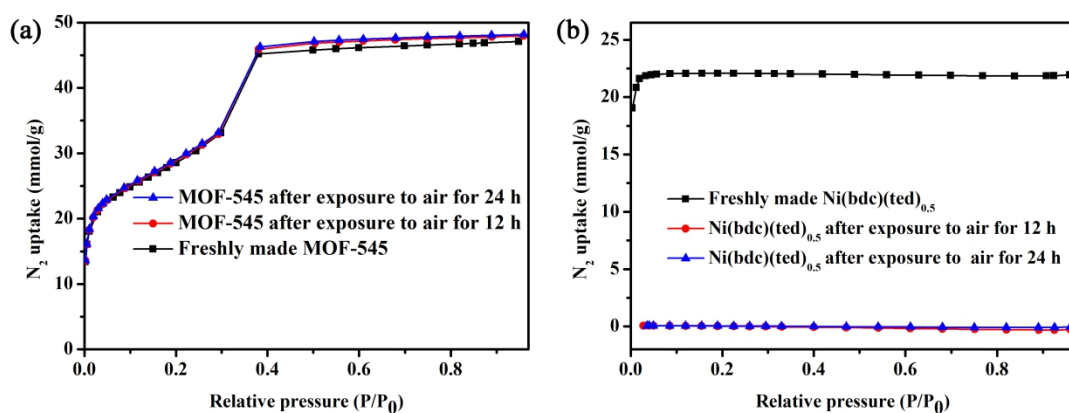

**Fig. S6** N<sub>2</sub> sorption isotherms at 77 K of (a) MOF-545 and (b) Ni(bdc)(ted)<sub>0.5</sub> samples before and after exposure to air (43% RH) for 12 and 24 h.

## Air stability

The stability experiments of samples under 43% relative humidity (RH) atmosphere were conducted by putting ~80 mg samples in a sealed chamber containing saturated potassium carbonate solution<sup>1</sup> for 12 or 24 h at ambient temperature. After that, samples were dried for 6 h at 393 K under vacuum. The stability of samples was characterized by PXRD and N<sub>2</sub> sorption experiments at 77 K.

**Table S1** BET surface areas of MOF-545 and Ni(bdc)(ted)<sub>0.5</sub> samples after different tests

| Samples                                                    | BET surface areas (m <sup>2</sup> /g) | Langmuir surface areas (m <sup>2</sup> /g) |
|------------------------------------------------------------|---------------------------------------|--------------------------------------------|
| Freshly made MOF-545                                       | 2265.4                                | 3124.7                                     |
| MOF-545 after exposure to air for 12 h                     | 2262.8                                | 3156.8                                     |
| MOF-545 after exposure to air for 24 h                     | 2276.1                                | 3176.7                                     |
| Freshly made Ni(bdc)(ted) <sub>0.5</sub>                   | 1977.0                                | 2133.4                                     |
| Ni(bdc)(ted) <sub>0.5</sub> after exposure to air for 12 h | 4.6                                   | 0.1                                        |
| Ni(bdc)(ted) <sub>0.5</sub> after exposure to air for 24 h | 4.4                                   | 0.5                                        |

**Table S2** Ethane and ethylene uptakes and ethane/ethylene IAST selectivities at 100 kPa on the selected ethane-selective adsorbents

| Adsorbents                      | T (K) | Ethane uptake (mmol/g) | Ethylene uptake (mmol/g) | Ethane/ethylene selectivity <sup>a</sup> | The ratio of ethane/ethylene uptake | Ref. |
|---------------------------------|-------|------------------------|--------------------------|------------------------------------------|-------------------------------------|------|
| Activated carbon (Calgon Co.)   | 303   | 2.66                   | 1.78                     | -                                        | -                                   | 2    |
| Activated carbon                | 298   | 2.52                   | 2.19                     | 1.2 <sup>b</sup>                         | 1.15                                | 3    |
| ZIF-7                           | 298   | 1.98                   | 1.92                     | 2.45                                     | 1.03                                | 4    |
| ZIF-8                           | 293   | 2.50                   | 1.50                     | 1.85 <sup>c</sup>                        | 1.67                                | 5    |
| ZJU-121a                        | 296   | 4.91                   | 3.29                     | 2.74                                     | 1.49                                | 6    |
| UTSA-33a                        | 296   | 2.73                   | 2.62                     | -                                        | 1.04                                | 7    |
| ZIF-69                          | 298   | 2.20                   | 1.77                     | 1.66                                     | 1.24                                | 8    |
| MIL-53(Al)-FA                   | 308   | 3.7                    | 3.58                     | 1.2                                      | 1.03                                | 9    |
| CPM-233                         | 298   | 7.45                   | 6.52                     | 1.64                                     | 1.14                                | 10   |
| IRMOF-8                         | 298   | 4.00                   | 3.20                     | 1.75                                     | 1.25                                | 11   |
| MAF-49                          | 298   | 1.73                   | 1.70                     | 2.7                                      | 1.02                                | 12   |
| Ni(bdc)(ted) <sub>0.5</sub>     | 298   | 5.0                    | 3.4                      | 1.85                                     | 1.59                                | 13   |
| Ni(TMBDC)(DABCO) <sub>0.5</sub> | 298   | 5.44                   | 5                        | 1.99 <sup>d</sup>                        | 1.09                                | 14   |

|                                          |     |      |      |      |      |           |
|------------------------------------------|-----|------|------|------|------|-----------|
| MIL-142A                                 | 298 | 3.8  | 2.9  | 1.5  | 1.31 | 15        |
| UiO-66-2CF <sub>3</sub>                  | 298 | 0.88 | 0.5  | 2.54 | 1.76 | 16        |
| Ni-4PyC                                  | 298 | 3.8  | 3.5  | 1.7  | 1.09 | 17        |
| NIIC-20-Bu                               | 298 | 2.5  | 1.4  | 15.4 | 1.79 | 18        |
| Cu(Qc) <sub>2</sub>                      | 298 | 1.85 | 0.78 | 3.4  | 2.37 | 19        |
| PCN-245                                  | 298 | 3.27 | 2.39 | 1.80 | 1.37 | 20        |
| Fe <sub>2</sub> (O <sub>2</sub> )(dobdc) | 298 | 3.03 | 1.90 | 4.4  | 1.59 | 21        |
| Zr-bptc                                  | 298 | 3.26 | 3.08 | 1.4  | 1.04 | 22        |
| MOF-545                                  | 298 | 3.12 | 2.57 | 1.31 | 1.21 | This work |

a: ethane/ethylene selectivity towards equimolar ethane/ethylene mixtures.

b: selectivity at 303 K.

c: selectivity calculated on the basis of Henry constant.

d: ethane/ethylene selectivity towards ethane/ethylene = 1:15 mixtures.

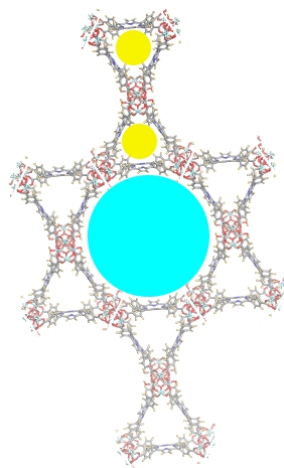

**Fig. S7** The framework of MOF-545. The yellow and cobalt balls represent the small and large pores MOF-545, respectively.

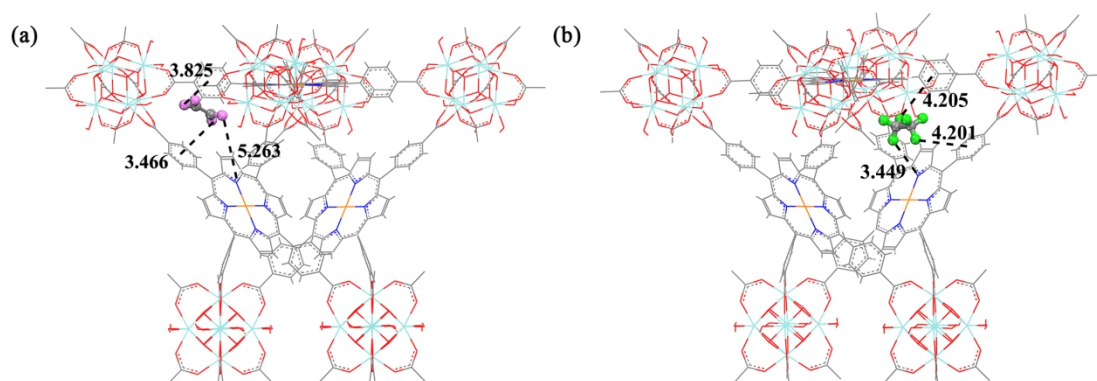

**Fig. S8** The preferential binding sites of (a) ethylene and (b) ethane in MOF-545(Fe). Color code: N (blue), O (red), C (gray), H of ethylene (pink), H of ethane (cyan), Fe (orange) and Zr (light green).

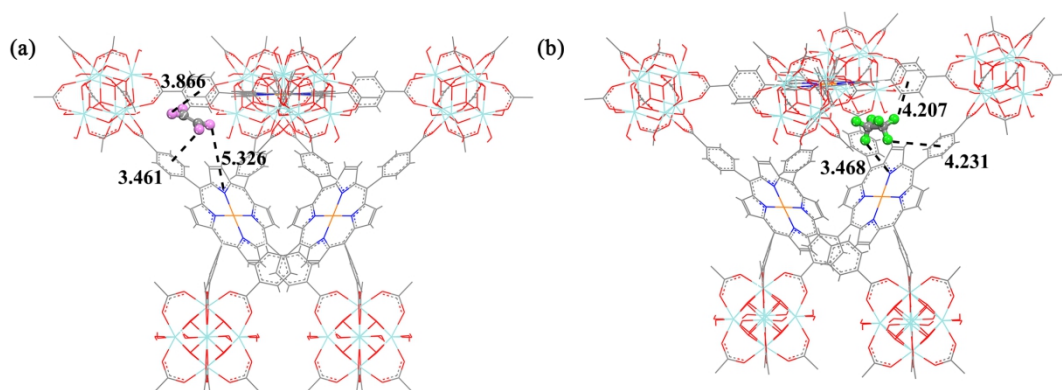

**Fig. S9** The preferential binding sites of (a) ethylene and (b) ethane in MOF-545(Co). Color code: N (blue), O (red), C (gray), H of ethylene (pink), H of ethane (cyan), Co (orange) and Zr (light green).

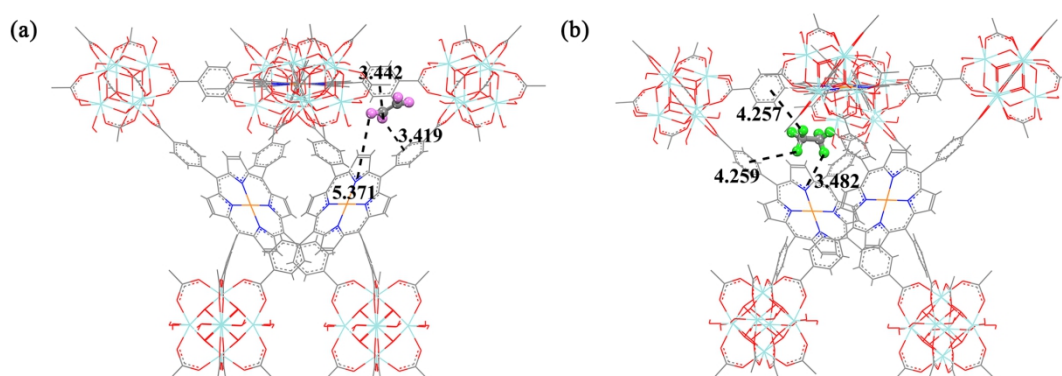

**Fig. S10** The preferential binding sites of (a) ethylene and (b) ethane in MOF-545(Ni). Color code: N (blue), O (red), C (gray), H of ethylene (pink), H of ethane (cyan), Ni (orange) and Zr (light green).

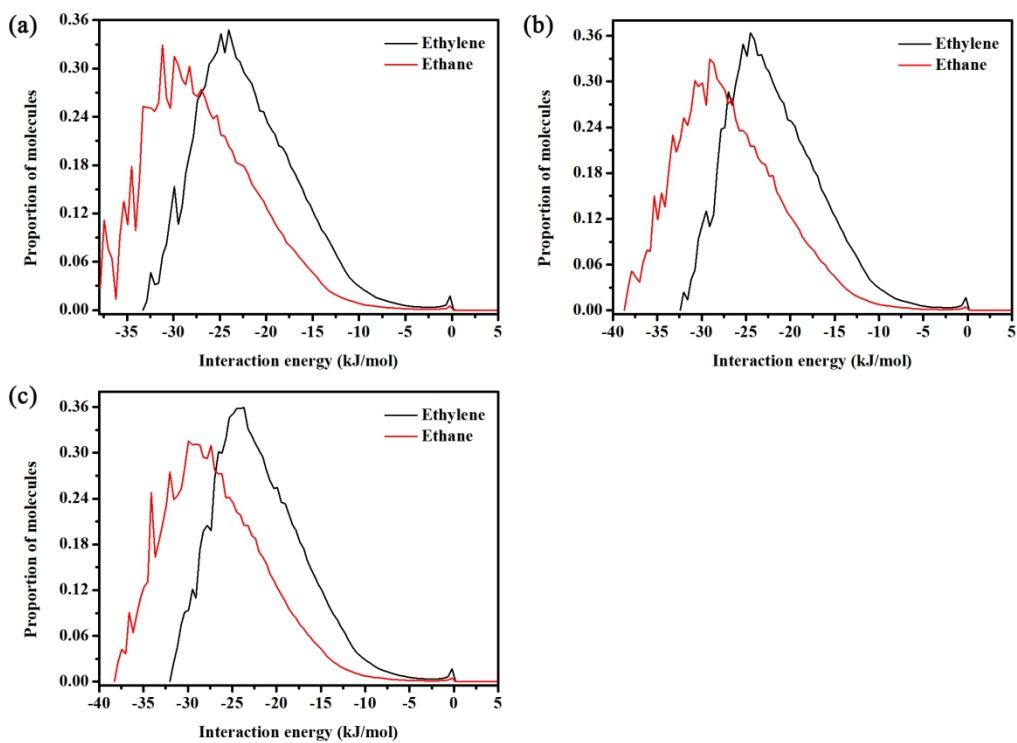

**Fig. S11** The interaction energy distributions of ethane and ethylene in the frameworks of MOF-545(Fe) (a), MOF-545(Co) (b), and MOF-545(Ni) (c).

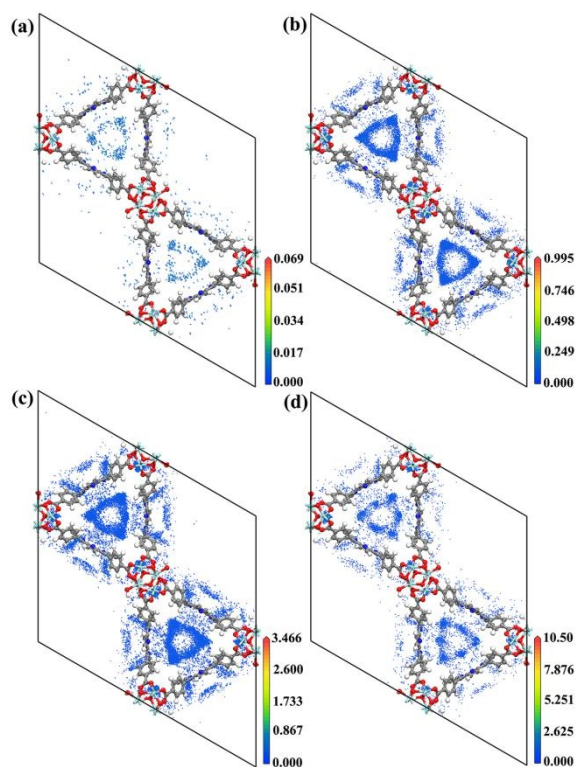

**Fig. S12** Adsorption density contours of ethylene in MOF-545 at (a) 0.1 kPa; (b) 10 kPa; (c) 30 kPa and (d) 70 kPa. Color code: N (blue), O (red), C (gray), H (white) and Zr (light green).

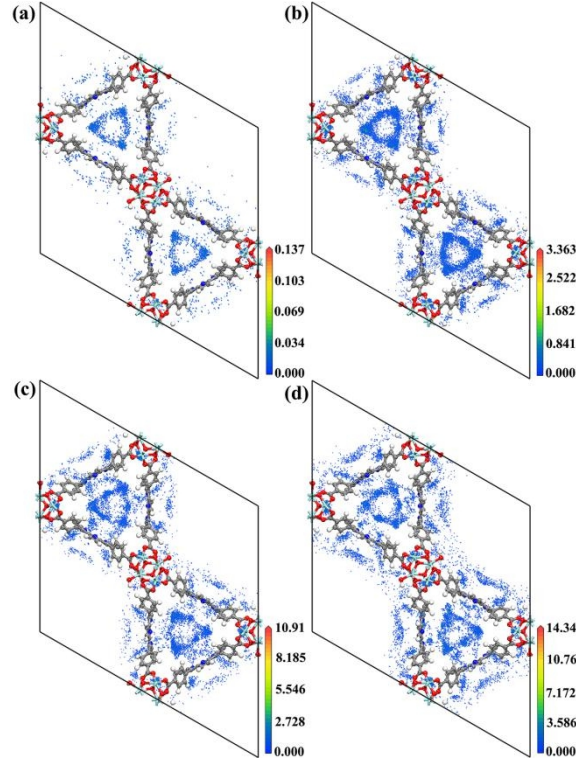

**Fig. S13** Adsorption density contours of ethane in MOF-545 at (a) 0.1 kPa; (b) 10 kPa; (c) 30 kPa and (d) 70 kPa. Color code: N (blue), O (red), C (gray), H (white) and Zr (light green).

### The calculation of $Q_{st}$ based on Virial equation

Virial equation (Eq. S1) was used to fit ethane and ethylene sorption isotherms at 288, 298 and 308 K. After that, the fitting parameters were employed to calculate  $Q_{st}$  of ethane and ethylene utilizing Eq. S2.

$$\ln P = \ln N + \frac{1}{T} \sum_{i=0}^m a_i N^i + \sum_{i=0}^n b_i N^i \quad (1)$$

$$Q_{st} = -R \sum_{i=0}^m a_i N^i \quad (2)$$

where  $P$  represents pressure (mmHg),  $N$  refers to adsorption uptake (mg/g),  $T$  represents temperature (K),  $m$  and  $n$  are the number of coefficients required to well fit the sorption isotherms (herein,  $m = 8$ ,  $n = 3$ ),  $a_i$  and  $b_i$  represents Virial coefficients, and  $R$  refers to gas constant [J/(K·mol)].



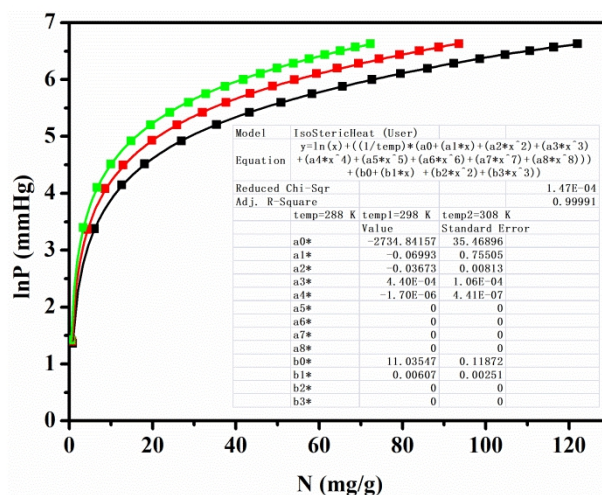

**Fig. S14** Virial fitting (lines) of ethane adsorption isotherms (points) of MOF-545 measured at 288 (black), 298 (red), 308 (green) K. The inset shows the fittings of adsorption heat parameters of ethane adsorption in MOF-545.

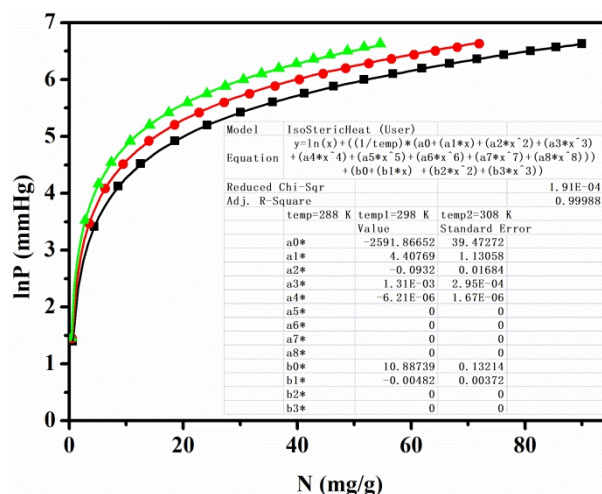

**Fig. S15** Virial fitting (lines) of ethylene adsorption isotherms (points) of MOF-545 measured at 288 (black), 298 (red), 308 (green) K. The inset shows the fittings of adsorption heat parameters of ethylene adsorption in MOF-545.

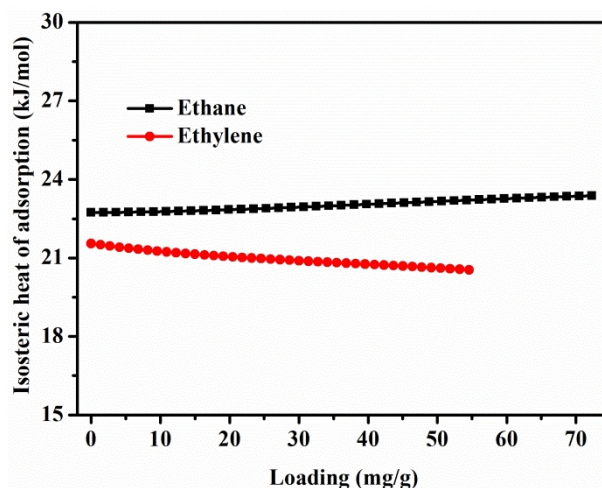

**Fig. S16** The calculated isosteric heats of ethane and ethylene adsorption on MOF-545 on the basis of Virial equation.

**Table S3** The fitting parameters of DSLF model for MOF-545

| Gas      | T/K | $q_{A,sat}$ | $k_A$     | m      | $q_{B,sat}$ | $k_B$     | n      | $R^2$  |
|----------|-----|-------------|-----------|--------|-------------|-----------|--------|--------|
| Ethylene | 288 | 5.3843      | 6.5300E-3 | 0.9887 | 2.9802      | 2.7093E-4 | 1.6773 | 0.9999 |
|          | 298 | 3.8434      | 2.8436E-4 | 1.6974 | 1.8662      | 1.8140E-2 | 0.8821 | 0.9999 |
|          | 308 | 3.0925      | 1.7977E-4 | 1.7998 | 0.8992      | 2.5130E-2 | 1.0062 | 0.9999 |
| Ethane   | 288 | 6.7652      | 6.6400E-3 | 0.9910 | 4.0123      | 7.4778E-4 | 1.4320 | 0.9999 |
|          | 298 | 5.1023      | 2.2453E-4 | 1.6446 | 2.7973      | 1.3290E-2 | 0.9893 | 0.9999 |
|          | 308 | 3.5344      | 4.0100E-4 | 1.6406 | 1.4927      | 2.1360E-2 | 0.9004 | 0.9999 |

### The calculation of $Q_{st}$ based on the combination of DSLF model and Clausius-Clapeyron equation

The isosteric heats of ethane and ethylene were also calculated based on the combination of DSLF model and Clausius-Clapeyron equation.

The Clausius-Clapeyron equation<sup>20</sup> after integration can be expressed as follows:

$$\ln p = -\frac{Q_{st}}{RT} + C \quad (3)$$

where  $p$  is the pressure (kPa),  $Q_{st}$  is the isosteric heat of adsorption (kJ/mol),  $R$  is the ideal gas constant [J/(mol·K)],  $T$  is the temperature (K), and  $C$  is the integral constant.

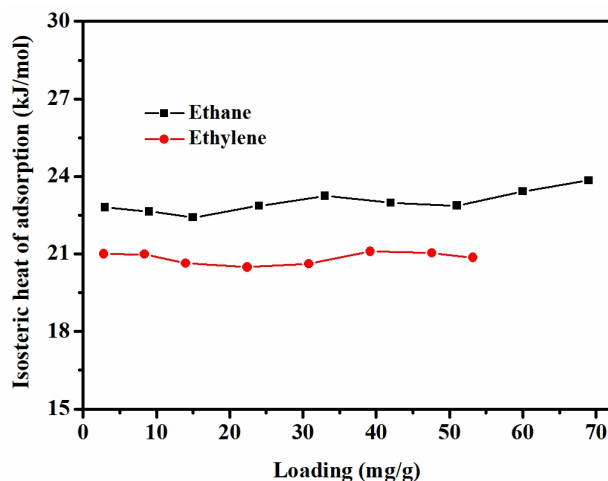

**Fig. S17** The calculated isosteric heats of ethane and ethylene adsorption on MOF-545 on the basis of the combination of DSLF model and Clausius-Clapeyron equation.

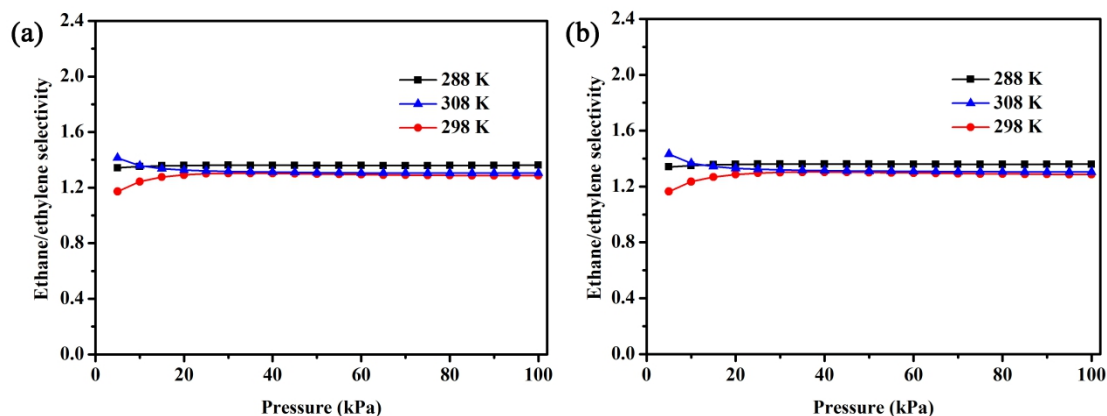

**Fig. S18** IAST-predicted selectivities of ethane/ethylene binary mixtures on MOF-545 at 288, 298 and 308 K: (a) ethane/ethylene = 1:1 by volume; (b) ethane/ethylene = 1:15 by volume.

### The calculation of ethane/ethylene selectivity for binary/ternary mixture on the basis of simulation calculations

Metropolis Monte Carlo method was used to calculate the adsorption density distribution of ethane, ethylene and typical impurities (methane, acetylene, propylene, or the trace amount of CO, CO<sub>2</sub>, H<sub>2</sub>S) in MOF-545. The force field models of typical impurities are obtained from the literatures<sup>23-26</sup>. To calculate ethane/ethylene selectivity for binary/ternary mixture, the molar ratio of C<sub>2</sub>H<sub>6</sub> : C<sub>2</sub>H<sub>4</sub> : CH<sub>4</sub> : C<sub>2</sub>H<sub>2</sub> : C<sub>3</sub>H<sub>6</sub> : CO : CO<sub>2</sub> : H<sub>2</sub>S = 11.8% : 12.8% : 28.5% : 1% : 1.1% : 0.6% : 0.6% : 0.6% was used mostly with reference to the composition of refinery off-gas<sup>27</sup>.

The ethane/ethylene selectivities were calculated according to the following

equation:

$$S_{ij} = \frac{x_i y_j}{x_j y_i}$$

where  $x_i$  and  $x_j$  are the ethane and ethylene uptakes on MOF-545, respectively,  $y_i$  and  $y_j$  are the mole fractions of ethane and ethylene, respectively.

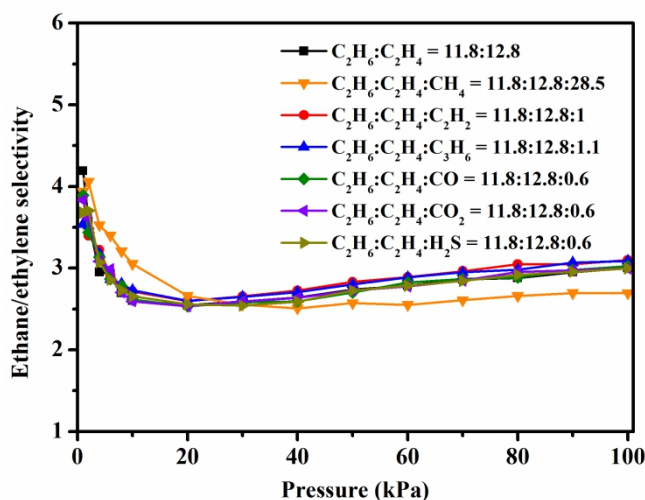

**Fig. S19** Ethane/ethylene selectivity for binary/ternary mixture on MOF-545 at 298 K based on simulation calculations.

### The calculation of simulated breakthrough curves of ethane/ethylene mixture on MOF-545 at ambient and high pressures

To obtain the breakthrough curves of ethane/ethylene mixture (ethane/ethylene = 1/15) at 1 and 35 bar (298 K) in a fixed-bed packed with adsorbent, the breakthrough curves of ethane/ethylene on MOF-545 were calculated. We assumed plug-flow conditions of the ethane/ethylene mixtures through a adsorption column with length of  $L = 1$  m with the porosity of the column of 0.4 and the gas flow rate of 25 mL/min. Ethane and ethylene uptakes were assumed in the simulated breakthrough curves based on the fitting parameters of ethane/ethylene isotherms at 298 K. The concentration of ethane and ethylene can be expressed as follows:

$$\frac{\partial C_i}{\partial t} = -\frac{\partial(vC_i)}{\partial Z} - \left(\frac{1-\varepsilon}{\varepsilon}\right)RT\rho \frac{\partial q_i}{\partial t}$$

$$\frac{\partial C}{\partial t} = -\frac{\partial(vC)}{\partial Z} - \left(\frac{1-\varepsilon}{\varepsilon}\right)RT\rho \sum_{i=1}^2 \frac{\partial q_i}{\partial t}$$

where  $t$  is the time,  $Z$  is the axial position along the fixed-bed,  $v$  is the interstitial velocity,  $C_i$  is the concentration of component  $i$ ,  $C$  is the total concentration of gas mixture,  $\varepsilon$  is the bed void fraction,  $\rho$  is the density of adsorbent, and  $q_i$  is the adsorbed amount for component  $i$ .  $v$  is calculated using Darcy's equation<sup>28</sup>:

$$\frac{\partial C}{\partial Z} = \frac{150\mu}{4(r_p)^2} \left(\frac{1-\varepsilon}{\varepsilon}\right)^2 v$$

where  $r_p$  is the particle radius, and  $\mu$  is the fluid viscosity.  $q_i$  is calculated as following:

$$\frac{\partial q_i}{\partial t} = k_i(q_i^* - q_i)$$

where  $k_i$  is the mass-transfer coefficient for component  $i$ , and  $q_i^*$  is the equilibrium uptake of component  $i$ .  $q_i^*$  is calculated based on the single-component isotherm and IAST calculation.

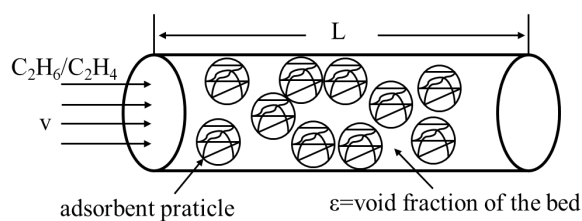

**Fig. S20** Schematic diagram of simulated fixed bed.

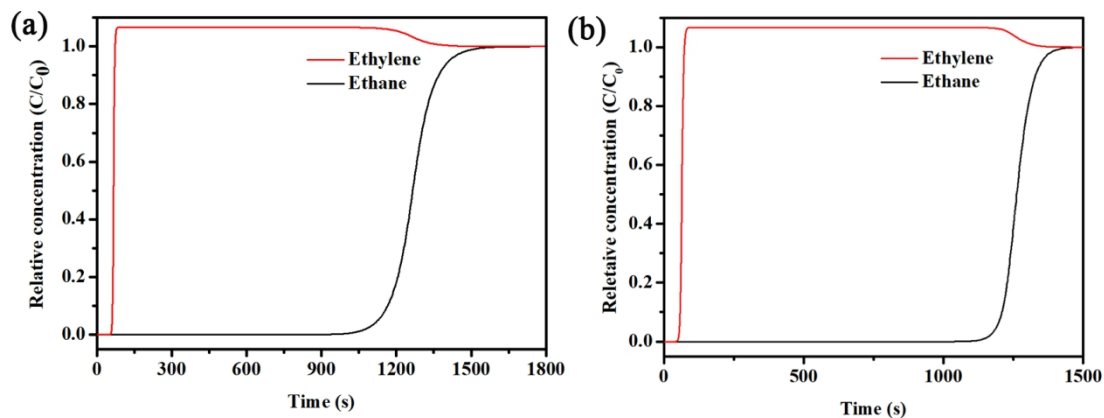

**Fig. S21** Simulated breakthrough curves of ethane/ethylene mixtures (1:15 by volume) on MOF-545 at 298 K and different pressures: (a) 1 bar and (b) 35 bar.

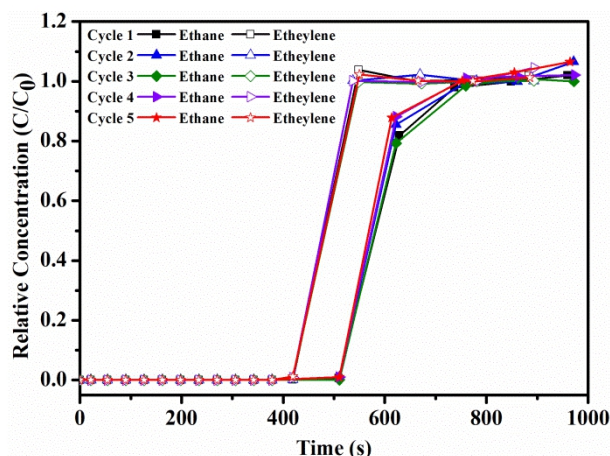

**Fig. S22** Cyclic breakthrough curves for ethane/ethylene mixtures (1:15 by volume) on MOF-545 at 298 K and 100 kPa.

## References

- 1 L. B. Rockland, *Anal. Chem.*, 1960, **32**, 1375-1376.
- 2 B. U. Choi, D. K. Choi, Y. W. Lee, B. K. Lee and S. H. Kim, *J. Chem. Eng. Data*, 2003, **48**, 603-607.
- 3 F. Gao, Y. Wang, X. Wang and S. Wang, *Adsorption*, 2016, **22**, 1-10.
- 4 D. L. Chen, N. Wang, C. Xu, G. Tu, W. Zhu and R. Krishna, *Microporous Mesoporous Mater.*, 2015, **208**, 55-65.
- 5 U. B?Hme, B. Barth, C. Paula, A. Kuhnt, W. Schwieger, A. Mundstock, J. Caro and M. Hartmann, *Langmuir*, 2013, **29**, 8592-8600.
- 6 J. Pei, J.-X. Wang, K. Shao, Y. Yang, Y. Cui, H. Wu, W. Zhou, B. Li and G. Qian, *J. Mater. Chem. A*, 2020, **8**, 3613-3620.
- 7 Y. He, Z. Zhang, S. Xiang, F. R. Fronczek, P. D. R. Krishna and P. D. B. Chen, *Chemistry*, 2012, **18**, 613-619.
- 8 W. Yuan, X. Zhang and L. Li, *J. Solid State Chem.*, 2017, **251**, 198-203.
- 9 J. Peng, Y. Sun, Y. Wu, Z. Lv and Z. Li, *Ind. Eng. Chem. Res.*, 2019, **58**, 8290-8295.
- 10 H. Yang, Y. Wang, R. Krishna, X. Jia, Y. Wang, A. N. Hong, C. Dang, H. E. Castillo, X. Bu and P. Feng, *J. Am. Chem. Soc.*, 2020, **142**, 2222-2227.
- 11 R. S. Pillai, M. L. Pinto, J. O. Pires, M. Jorge and J. R. B. Gomes, *ACS Appl. Mater. Interfaces*, 2015, **7**, 624-637.
- 12 P. Q. Liao, W. X. Zhang, J. P. Zhang and X. M. Chen, *Nat. Commun.*, 2015, **6**, 8697.
- 13 W. L. A, F. X. A, X. Z. A. B, J. X. B, Q. X. B, Y. L. A and Z. L. A, *Chem. Eng. Sci.*, 2016, **148**, 275-281.
- 14 X. Wang, Z. Niu, A. M. Al-Enizi, A. Nafady, Y. Wu, B. Aguila, G. Verma, L. Wojtas, Y. S. Chen and Z. Li, *J. Mater. Chem. A*, 2019, **7**, 13585-13590.
- 15 Y. Chen, H. Wu, D. Lv, R. Shi, Y. Chen, Q. Xia and Z. Li, *Ind. Eng. Chem. Res.*, 2018, **57**, 4063-4069.
- 16 J. Pires, J. Fernandes, K. Dedecker, J. R. B. Gomes, G. Pérez-Sánchez, F. Nouar, C. Serre and M. L. Pinto, *ACS Appl. Mater. Interfaces*, 2019, **11**, 27410-27421.

- 17 H. Wu, Y. Chen, W. Yang, D. Lv, Y. Yuan, Z. Qiao, H. Liang, Z. Li and Q. Xia, *Ind. Eng. Chem. Res.*, 2019, **58**, 10516-10523.
- 18 A. A. Lysova, D. G. Samsonenko, K. A. Kovalenko, A. S. Nizovtsev, D. N. Dybtsev and V. P. Fedin, *Angew. Chem. Int. Ed.*, 2020, **132**, 20742-20748.
- 19 R.-B. Lin, H. Wu, L. Li, X.-L. Tang, Z. Li, J. Gao, H. Cui, W. Zhou and B. Chen, *J. Am. Chem. Soc.*, 2018, **140**, 12940-12946.
- 20 D. Lv, R. Shi, Y. Chen, Y. Wu, H. Wu, H. Xi, Q. Xia and Z. Li, *ACS Appl. Mater. Interfaces*, 2018, **10**, 8366-8373.
- 21 L. Li, R.-B. Lin, R. Krishna, H. Li, S. Xiang, H. Wu, J. Li, W. Zhou and B. Chen, *Science*, 2018, **362**, 443-446.
- 22 D. Lv, J. Chen, Y. Chen, Z. Liu, Y. Xu, C. Duan, H. Wu, Y. Wu, J. Xiao, H. Xi, Z. Li and Q. Xia, *AIChE J.*, 2019, **65**, e16616.
- 23 J. R. Karra and K. S. Walton, *J. Phys. Chem. C*, 2010, **114**, 15735-15740.
- 24 G. Kamath, N. Lubna and J. J. Potoff, *J. Chem. Phys.*, 2005, **123**, 124505.
- 25 M. Fischer, F. Hoffmann and M. Fröba, *ChemPhysChem*, 2010, **11**, 2220-2229.
- 26 M. G. Martin and J. I. Siepmann, *J. Phys. Chem. B*, 1998, **102**, 2569-2577.
- 27 G. Jing, W. Xianghong, J. Shuhong, Q. Zhang and D. Zheng, *Chinese J. Chem. Eng.*, 2011, **19**, 543-548.
- 28 Y. G. Chung, P. Bai, M. Haranczyk, K. T. Leperi, P. Li, H. Zhang, T. C. Wang, T. Duerinck, F. You and J. T. Hupp, *Chem. Mater.*, 2017, **29**, 6315-6328.
